# Supplementary material for: Evolution of Microstructure and Microsegregation of Ti‐45Al‐8Nb Alloy during Directional Solidification
Source: Hindawi journal article supplement (doi:10.1155/2018/1713835), 2018-01-01
Supplement: f1 [file 1713835.f1.xlsx]

## Sheet: Sheet1
		Al/at%				Nb/at%
dot	fs	30-1	200-1	30-2	200-2	30-1	200-1	30-2	200-2
1	0.00826	42.6269	41.9229	43.3995	43.9797	10.269	9.7894	9.532	9.0521
2	0.01653	42.676	42.1339	43.5348	44.0064	9.8866	9.4974	9.5312	8.9833
3	0.02479	42.7259	42.5574	43.6701	44.2021	9.5041	9.2054	9.5121	8.9181
4	0.03306	42.751	42.9808	43.72	44.2389	9.4543	9.1552	9.4989	8.8774
5	0.04132	42.7761	43.0808	43.7742	44.2819	9.4045	9.1051	9.4005	8.8366
6	0.04959	42.7582	43.0988	43.7809	44.3248	9.382	9.0615	9.3021	8.8004
7	0.05785	42.7805	43.1164	43.7877	44.3322	9.3594	9.046	9.1634	8.8
8	0.06612	42.8057	43.1463	43.8186	44.3397	9.2188	9.0343	9.0246	8.7896
9	0.07438	42.8534	43.1651	43.8494	44.3598	9.0782	8.9178	8.9305	8.7554
10	0.08264	42.9209	43.1838	43.8888	44.3738	9.0722	8.9141	8.8363	8.7438
11	0.09091	42.9885	43.188	43.9044	44.3878	9.0661	8.9115	8.832	8.7332
12	0.09917	43.0008	43.2361	43.9144	44.4099	9.06	8.8599	8.8282	8.6743
13	0.10744	43.0129	43.2843	43.9199	44.4554	9.0554	8.846	8.799	8.6584
14	0.1157	43.0173	43.3667	43.9224	44.4725	9.0541	8.8332	8.7699	8.5942
15	0.12397	43.0216	43.376	43.9249	44.4895	9.0525	8.7855	8.5323	8.5724
16	0.13223	43.0306	43.3853	43.9271	44.5126	9.0397	8.781	8.5116	8.3324
17	0.1405	43.0395	43.5446	43.9308	44.5171	9.0269	8.7761	8.4908	8.3171
18	0.14876	43.0548	43.6258	43.942	44.5469	9.015	8.7672	8.4712	8.3027
19	0.15702	43.07	43.7069	43.9538	44.5572	9.008	8.7635	8.4476	8.2972
20	0.16529	43.095	43.7278	43.9558	44.5591	8.9916	8.7602	8.4153	8.2922
21	0.17355	43.1199	43.7368	43.9569	44.561	8.975	8.7201	8.3831	8.2754
22	0.18182	43.1219	43.7457	43.9966	44.5943	8.9709	8.7152	8.3754	8.2198
23	0.19008	43.1239	43.7585	44.0363	44.6121	8.9668	8.7107	8.3543	8.2182
24	0.19835	43.1682	43.8138	44.0444	44.6145	8.96	8.7014	8.3352	8.2001
25	0.20661	43.1758	43.869	44.0507	44.6305	8.9544	8.697	8.3174	8.1862
26	0.21488	43.1836	43.8846	44.0911	44.6421	8.9522	8.6938	8.3003	8.1778
27	0.22314	43.1934	43.8865	44.1317	44.6555	8.9502	8.6644	8.2831	8.1739
28	0.2314	43.2032	43.8885	44.165	44.6852	8.94	8.6607	8.2797	8.1687
29	0.23967	43.2186	43.9147	44.2013	44.688	8.9342	8.6569	8.2763	8.1591
30	0.24793	43.234	43.9541	44.2125	44.6918	8.934	8.6519	8.2661	8.1521
31	0.2562	43.2548	43.9937	44.2231	44.7142	8.9336	8.6487	8.2571	8.1403
32	0.26446	43.2717	44.0227	44.2292	44.7365	8.922	8.6455	8.2441	8.1054
33	0.27273	43.2888	44.0408	44.2365	44.747	8.9114	8.6189	8.2327	8.0951
34	0.28099	43.2926	44.0588	44.2565	44.7705	8.8551	8.5884	8.2043	8.0924
35	0.28926	43.2966	44.144	44.2753	44.7893	8.7988	8.5578	8.1759	8.0921
36	0.29752	43.301	44.2374	44.2826	44.794	8.7808	8.5106	8.152	8.0919
37	0.30579	43.3044	44.3308	44.2929	44.7986	8.7627	8.4965	8.1305	8.0777
38	0.31405	43.318	44.3956	44.3039	44.8118	8.7577	8.4823	8.1206	8.0776
39	0.32231	43.3795	44.4032	44.3137	44.8491	8.7526	8.4807	8.1108	8.0761
40	0.33058	43.3773	44.4108	44.3236	44.8619	8.7341	8.4752	8.0909	8.0717
41	0.33884	43.4642	44.4874	44.3419	44.868	8.7141	8.4697	8.0739	8.0674
42	0.34711	43.5509	44.503	44.3617	44.8742	8.6764	8.4592	8.0614	8.0531
43	0.35537	43.5748	44.5188	44.3717	44.8835	8.6386	8.4399	8.0581	8.0448
44	0.36364	43.5985	44.5599	44.3852	44.8884	8.6375	8.4205	8.0553	8.0421
45	0.3719	43.6014	44.569	44.4022	44.8999	8.6369	8.3971	8.05	8.0411
46	0.38017	43.6046	44.578	44.4322	44.9002	8.6251	8.3868	8.047	8.0321
47	0.38843	43.6342	44.6146	44.4645	44.9004	8.6149	8.3765	8.0469	8.0246
48	0.39669	43.6673	44.615	44.5987	44.9203	8.6125	8.3018	8.0467	8.0235
49	0.40496	43.6823	44.6155	44.6483	44.9205	8.6084	8.3013	8.0341	8.0192
50	0.41322	43.7007	44.6202	44.6495	44.9337	8.543	8.3008	8.0139	8.0154
51	0.42149	43.7096	44.649	44.6825	44.9402	8.5234	8.2889	7.9928	8.0011
52	0.42975	43.7185	44.678	44.7156	44.9471	8.5038	8.2786	7.9838	7.9858
53	0.43802	43.8578	44.7034	44.7874	44.9592	8.4501	8.2686	7.9772	7.984
54	0.44628	43.997	44.7051	44.7971	44.9628	8.3998	8.2568	7.9671	7.9734
55	0.45455	44.0163	44.7066	44.8067	44.9689	8.3799	8.2498	7.9589	7.9611
56	0.46281	44.0354	44.723	44.8237	44.9715	8.3646	8.2427	7.9564	7.9474
57	0.47107	44.1059	44.7241	44.8406	44.9741	8.359	8.2377	7.9484	7.9443
58	0.47934	44.1297	44.725	44.8945	44.9743	8.251	8.2261	7.9405	7.9419
59	0.4876	44.1536	44.811	44.9263	44.9764	8.171	8.2146	7.9231	7.9385
60	0.49587	44.1862	44.8177	44.9511	44.9866	8.1238	8.2095	7.9056	7.9231
61	0.50413	44.2186	44.8245	44.9828	44.995	8.0766	8.193	7.8881	7.9102
62	0.5124	44.2208	44.8252	45.0042	45.0034	7.981	8.1764	7.887	7.9013
63	0.52066	44.2229	44.827	45.0255	45.0075	7.8834	8.1635	7.8856	7.9008
64	0.52893	44.4413	44.8288	45.0278	45.021	7.8621	8.162	7.8818	7.9004
65	0.53719	44.6595	44.9355	45.03	45.0212	7.7754	8.1607	7.878	7.8974
66	0.54545	44.7074	44.9451	45.0399	45.0225	7.6886	8.1313	7.8625	7.8955
67	0.55372	44.7552	44.9547	45.0545	45.0241	7.6688	8.1281	7.8604	7.8938
68	0.56198	44.7566	44.9733	45.0621	45.059	7.649	8.1248	7.8589	7.8911
69	0.57025	44.7579	44.9828	45.0719	45.0723	7.6201	8.1083	7.8571	7.8731
70	0.57851	44.8203	44.9922	45.1123	45.085	7.596	8.0878	7.8559	7.855
71	0.58678	44.8825	45.0253	45.2517	45.0877	7.5301	8.0672	7.85	7.8529
72	0.59504	44.9252	45.0313	45.2551	45.0889	7.525	8.0672	7.8442	7.8521
73	0.60331	44.9679	45.0372	45.2594	45.0988	7.519	8.067	7.7801	7.8441
74	0.61157	45.0994	45.0422	45.2735	45.1234	7.5001	8.0667	7.7631	7.8428
75	0.61983	45.2307	45.0463	45.2921	45.1285	7.478	8.0384	7.7592	7.8341
76	0.6281	45.2969	45.0504	45.2951	45.1435	7.4512	8.0381	7.7562	7.8307
77	0.63636	45.363	45.0506	45.2987	45.1618	7.4347	8.0378	7.7536	7.8242
78	0.64463	45.4755	45.0955	45.328	45.1694	7.378	7.9806	7.7507	7.8234
79	0.65289	45.5879	45.136	45.3572	45.1771	7.363	7.9775	7.725	7.8143
80	0.66116	45.8366	45.1584	45.3772	45.1773	7.3391	7.9724	7.7033	7.7989
81	0.66942	45.909	45.1724	45.4119	45.1825	7.3141	7.9714	7.6999	7.7955
82	0.67769	45.9812	45.1863	45.4622	45.1865	7.2891	7.8897	7.6951	7.795
83	0.68595	46.1596	45.2223	45.5259	45.2199	7.2889	7.8299	7.6771	7.7943
84	0.69421	46.3379	45.2245	45.5451	45.2217	7.2885	7.77	7.6524	7.7862
85	0.70248	46.3477	45.2267	45.5766	45.2315	7.2133	7.7055	7.6499	7.7657
86	0.71074	46.3574	45.231	45.5946	45.2717	7.138	7.6868	7.6471	7.7618
87	0.71901	46.3743	45.2493	45.6127	45.2835	7.1226	7.668	7.6331	7.7576
88	0.72727	46.3911	45.2676	45.6328	45.2993	7.1071	7.6644	7.619	7.7417
89	0.73554	46.5029	45.3074	45.6766	45.3098	7.1001	7.6634	7.5576	7.7386
90	0.7438	46.6146	45.3099	45.6881	45.311	7.0939	7.6624	7.5362	7.7339
91	0.75207	46.6697	45.3122	45.7031	45.327	7.0629	7.6477	7.5162	7.726
92	0.76033	46.7248	45.3435	45.7441	45.3291	7.0391	7.6093	7.516	7.7198
93	0.7686	46.8528	45.3787	45.7965	45.3544	6.9758	7.5708	7.5157	7.7174
94	0.77686	46.9808	45.4138	45.7977	45.3561	6.94	7.4724	7.4833	7.7164
95	0.78512	47.0778	45.4372	45.799	45.3583	6.9002	7.4522	7.4513	7.6805
96	0.79339	47.175	45.488	45.8232	45.3607	6.8745	7.401	7.4299	7.6797
97	0.80165	47.192	45.5387	45.8534	45.3644	6.8487	7.3597	7.4198	7.6796
98	0.80992	47.2089	45.5671	45.891	45.3679	6.792	7.3132	7.4121	7.6795
99	0.81818	47.2215	45.6704	45.9261	45.3836	6.7352	7.3022	7.4043	7.6706
100	0.82645	47.234	45.7737	45.9513	45.4018	6.6346	7.2711	7.3845	7.6559
101	0.83471	47.2611	45.8935	45.988	45.4169	6.5339	7.2482	7.3688	7.6365
102	0.84298	47.288	45.9262	46.0112	45.4303	6.5292	7.2431	7.3358	7.6109
103	0.85124	47.3042	45.9588	46.0277	45.4437	6.5244	7.2283	7.3028	7.6083
104	0.8595	47.3853	46.0577	46.0845	45.4612	6.512	7.2134	7.2828	7.6064
105	0.86777	47.4662	46.0758	46.1419	45.4936	6.5018	7.2108	7.2623	7.5997
106	0.87603	47.5806	46.0941	46.2823	45.5043	6.496	7.171	7.25	7.577
107	0.8843	47.6948	46.1087	46.4226	45.5478	6.4909	7.1312	7.239	7.563
108	0.89256	47.786	46.15	46.5517	45.5649	6.4799	6.9617	7.228	7.562
109	0.90083	47.8772	46.2049	46.6774	45.586	6.472	6.9279	7.2219	7.562
110	0.90909	47.9546	46.4578	46.6934	45.6105	6.4711	6.894	7.2119	7.5372
111	0.91736	48.0319	46.4692	46.7071	45.616	6.47	6.8827	7.2025	7.5104
112	0.92562	48.1427	46.4805	46.7331	45.6236	6.3502	6.8817	7.1321	7.5037
113	0.93388	48.2533	46.521	46.7605	45.6551	6.2304	6.8805	7.0635	7.4959
114	0.94215	48.3081	46.522	46.8521	45.6666	6.2301	6.6947	7.043	7.488
115	0.95041	48.3643	46.5225	46.9768	45.6711	6.2297	6.5719	7.0229	7.484
116	0.95868	48.3971	46.7486	47.0892	45.6778	5.9578	6.449	6.9569	7.4401
117	0.96694	48.4297	47.0444	47.2017	45.6817	5.6859	6.2285	6.8839	7.4065
118	0.97521	48.7757	47.3383	47.2611	45.7091	5.6283	6.0615	6.7534	7.3148
119	0.98347	49.1217	47.7254	47.3225	45.7271	5.5707	5.8944	6.6316	7.2948
120	0.99174	50.117	48.0673	47.4553	45.7761	5.029	5.4762	6.5902	7.2847
121	1	51.112	48.4091	47.6618	45.8063	4.4873	5.064	6.5489	7.1138
